# Supplementary material
Source: Springer Nature journal article supplement (https://www.springermedizin.de/resource/supplementary/12891_2013_2434_MOESM1_ESM.pdf/9509344)
Supplement: MOESM1 [file 9509344]

## Cuestionario de Actividad Física de Yale

|                                                               |        |       |
|---------------------------------------------------------------|--------|-------|
| <i>Entrevistador: favor documente fecha y hora de la cita</i> | Fecha: | Hora: |
|---------------------------------------------------------------|--------|-------|

Existe muy poca información acerca de los patrones de actividad física en individuos de edad avanzada, por lo cual, se está llevando a cabo este estudio para medir cuán activas son las personas de edad avanzada. Adicionalmente, nos gustaría determinar las actividades en las cuales participan las personas de edad avanzada con más frecuencia.

Le voy a hacer unas preguntas acerca de las actividades que usualmente se llevan a cabo, como parte de su rutina diaria y también por placer. No existen respuestas correctas o incorrectas. Su nombre no será utilizado en los resultados, de manera que la información que usted comparta conmigo permanecerá confidencial y será utilizada solo para fines de investigación.

Al dar de su tiempo para llenar los cuestionarios, nos permitirá entender mejor los problemas de salud que afligen a algunas personas mayores. Esta información nos puede ayudar a idear formas en las que podemos mejorar la salud y el bien estar de las personas mayores.

Código: \_\_\_\_\_

Nombre: \_\_\_\_\_

Dirección 1: \_\_\_\_\_

Dirección 2: \_\_\_\_\_

Número Telefónico: \_\_\_\_\_

Fecha de nacimiento: \_\_\_\_\_

Edad: \_\_\_\_\_

Fecha de la entrevista: \_\_\_\_\_

## Parte Uno

*Entrevistador: (favor leer al participante):* Nos interesa aprender acerca del tipo de actividades que forman parte de su rutina diaria. Le voy a mostrar listas de tipos de actividades físicas comunes. Por favor, dígame cuanto tiempo (en minutos u horas) dedicó a ellas durante esta semana pasada.

*Entrevistador: Muestre al participante la Tarjeta numero 1.*

| Actividad                                     | Tiempo |         | Código de intensidad |
|-----------------------------------------------|--------|---------|----------------------|
|                                               | Horas  | Minutos |                      |
| <b>Trabajo</b>                                |        |         |                      |
| Compras (ej., supermercado, ropa)             | _____  | _____   | 3.5                  |
| Subiendo escaleras con una carga.             | _____  | _____   | 8.5                  |
| Lavando:                                      | _____  | _____   |                      |
| Descargando/cargando máquina,                 | _____  | _____   | 3.0                  |
| colgando, doblando,                           | _____  | _____   |                      |
| lavando ropa a mano                           | _____  | _____   | 4.0                  |
| Trabajo de casa ligero: organizando,          | _____  | _____   | 3.0                  |
| despolvando, barriendo, recogiendo basura     |        |         |                      |
| en el hogar, puliendo, planchando.            |        |         |                      |
| Trabajo de casa pesado: barriendo, trapeando, | _____  | _____   | 4.5                  |
| fregando piso y paredes, moviendo muebles,    |        |         |                      |
| cajas o zafacones de basura.                  |        |         |                      |
| Preparación de comida: cortando, mezclando,   | _____  | _____   | 2.5                  |
| buscando los alimentos y útiles para cocinar. |        |         |                      |
| Servicio de comida: poniendo la mesa,         | _____  | _____   | 2.5                  |
| cargando comida, sirviendo comida             |        |         |                      |
| Limpieza: recogiendo la mesa, lavando /       | _____  | _____   | 2.5                  |
| secando platos, guardando platos.             |        |         |                      |
| Reparaciones del hogar ligeras: reparación    | _____  | _____   | 3.0                  |
| de aparatos pequeños, mantenimiento           |        |         |                      |
| del hogar ligero / reparaciones.              |        |         |                      |

| <b>Trabajo</b>                                                                    | <b>Horas</b> | <b>Minutos</b> | <b>Código de intensidad</b> |
|-----------------------------------------------------------------------------------|--------------|----------------|-----------------------------|
| Reparaciones del hogar pesadas: pintando, carpintería, lavando/puliendo vehículo. | _____        | _____          | 5.5                         |
| Otro: _____                                                                       | _____        | _____          | _____                       |

| <b>Trabajo en el patio</b>                                       | <b>Horas</b> | <b>Minutos</b> | <b>Código de intensidad</b> |
|------------------------------------------------------------------|--------------|----------------|-----------------------------|
| Jardinería, podando, plantando, deshierbando, cavando, surcando  | _____        | _____          | 4.5                         |
| Cortando césped (solo si caminando)                              | _____        | _____          | 4.5                         |
| Aclarando caminos/marquesinas: barriendo, paleando, rastrillando | _____        | _____          | 5.0                         |
| Otro: _____                                                      | _____        | _____          | _____                       |

| <b>Cuidando</b>                                                         | <b>Horas</b> | <b>Minutos</b> | <b>Código de intensidad</b> |
|-------------------------------------------------------------------------|--------------|----------------|-----------------------------|
| Personas mayores o discapacitadas (cargando, empujando silla de ruedas) | _____        | _____          | 5.5                         |
| Niños (haciendo fuerza, cargando, empujando coche)                      | _____        | _____          | 4.0                         |

| <b>Ejercicio</b>                           | <b>Horas</b> | <b>Minutos</b> | <b>Código de intensidad</b> |
|--------------------------------------------|--------------|----------------|-----------------------------|
| Caminando enérgicamente                    | _____        | _____          | 6.0                         |
| Ejercicios de piscina, estiramientos, yoga | _____        | _____          | 3.0                         |
| Calistenia vigorosa, aeróbicos             | _____        | _____          | 6.0                         |
| Ciclismo                                   | _____        | _____          | 6.0                         |
| Nadando (solo vueltas)                     | _____        | _____          | 6.0                         |
| Otro: _____                                | _____        | _____          | _____                       |

| Recreo                                              | Horas | Minutos | Código de intensidad |
|-----------------------------------------------------|-------|---------|----------------------|
| Caminando sin prisa/lentamente                      | _____ | _____   | 3.5                  |
| Costura: tejiendo, cosiendo, punto de cruz,<br>etc. | _____ | _____   | 1.5                  |
| Bailando: en grupo, en pareja, etc.                 | _____ | _____   | 5.5                  |
| Pescado                                             | _____ | _____   | 3.0                  |
| Nadando, beisbol                                    | _____ | _____   | 5.0                  |
| Balancedo                                           | _____ | _____   | 7.0                  |
| Billar                                              | _____ | _____   | 2.5                  |
| Otro: _____                                         | _____ | _____   | _____                |

## Parte Dos

Entrevistador: *favor leer al sujeto:*

Ahora me gustaría preguntarle acerca de ciertos tipos de actividades que ha realizado durante el último mes. Le voy a preguntar acerca de la cantidad de actividad vigorosa, caminatas lentas, tiempo sentado(a), parado(a) y algunas otras cosas, que hace regularmente.

1. ¿Aproximadamente, cuántas veces en el mes participó de actividades vigorosas, que duraron más de **10 minutos** y causaron aumentos importantes en su respiración, ritmo cardíaco, y cansancio de las piernas, o le llevaron a sudar?

Puntuación: Ninguna vez (pase a la pregunta 3) 0

1-3 veces por mes 1

1-2 veces por semana 2

3-4 veces por semana 3

5 + veces por semana 4

Prefirió no contestar 7

No sabe 8

Puntuación por frecuencia \_\_\_\_\_

2. ¿Aproximadamente cuanto tiempo le dedica cada vez a estas actividades vigorosas?

|                       |   |
|-----------------------|---|
| No aplica             | 0 |
| 10-30 minutos         | 1 |
| 31-60 minutos         | 2 |
| 60 + minutos          | 3 |
| Prefirió no contestar | 7 |
| No sabe               | 8 |

Puntuación por duración \_\_\_\_\_

Peso

5

**Puntuación índice por actividad vigorosa:**

Puntuación por frecuencia \_\_\_\_\_ X Puntuación por duración \_\_\_\_\_ X Peso \_\_\_\_\_ = \_\_\_\_\_

(Respuestas 7 u 8 son marcadas como ausentes)

3. Piense en las veces que ha caminado en el último mes. ¿Aproximadamente, cuántas veces en el mes caminó **por lo menos 10 minutos** o más **sin detenerse**, sin que la actividad fuese lo suficientemente agotadora como para causarle aumentos importantes en su respiración, ritmo cardíaco, o cansancio de las piernas, o que le llevara a sudar?

|                                                |   |
|------------------------------------------------|---|
| Puntuación: Ninguna vez (pase a la pregunta 5) | 0 |
| 1-3 veces por mes                              | 1 |
| 1-2 veces por semana                           | 2 |
| 3-4 veces por semana                           | 3 |
| 5 + veces por semana                           | 4 |
| Prefirió no contestar                          | 7 |
| No sabe                                        | 8 |

Puntuación por frecuencia \_\_\_\_\_

4. Cuando se encontraba caminando de esta forma, ¿por cuántos minutos lo hacía?

|                       |   |
|-----------------------|---|
| No aplica             | 0 |
| 10-30 minutos         | 1 |
| 31-60 minutos         | 2 |
| 60 + minutos          | 3 |
| Prefirió no contestar | 7 |
| No sabe               | 8 |

Puntuación por duración \_\_\_\_\_

Peso: 4

**Puntuación índice por caminatas sin prisa:**

Puntuación por frecuencia \_\_\_\_\_ X Puntuación por duración \_\_\_\_\_ X Peso \_\_\_\_\_ = \_\_\_\_\_

(Respuestas 7 u 8 son marcadas como ausentes)

5. ¿Aproximadamente, cuántas horas al día pasa haciendo cosas que le requieren estar de pie y moviéndose? Favor reporte solo ocasiones en las que está **realmente moviéndose**.

|                          |   |
|--------------------------|---|
| Ninguna                  | 0 |
| Menos de una hora al día | 1 |
| 1-3 horas al día         | 2 |
| 3-5 horas al día         | 3 |
| 5-7 horas al día         | 4 |
| Más de 7 horas al día    | 5 |
| Prefirió no contestar    | 7 |
| No sabe                  | 8 |

Puntuación por movimiento \_\_\_\_\_

Peso 3

**Puntuación índice por movimiento:**

Puntuación de movimiento \_\_\_\_\_ X Peso \_\_\_\_\_ = \_\_\_\_\_

(Respuestas 7 u 8 son marcadas como ausentes)

6. Piense en la cantidad de tiempo que pasó parado(a) o moviéndose sobre sus pies durante un día común en el último mes. ¿Aproximadamente, cuántas horas al día pasa **parado(a)**?

|                          |   |
|--------------------------|---|
| Ninguna                  | 0 |
| Menos de una hora al día | 1 |
| 1-3 horas al día         | 2 |
| 3-5 horas al día         | 3 |
| 5-7 horas al día         | 4 |
| Más de 7 horas al día    | 5 |
| Prefirió no contestar    | 7 |
| No sabe                  | 8 |

Puntuación por tiempo parado(a) \_\_\_\_\_

Peso 3

**Puntuación índice por tiempo parado(a):**

Puntuación por tiempo parado(a) \_\_\_\_\_ X Peso \_\_\_\_\_ = \_\_\_\_\_

(Respuestas 7 u 8 son marcadas como ausentes)

7. ¿Aproximadamente, cuántas horas al día pasaba sentado(a) en un día común durante el mes pasado?

|                            |   |
|----------------------------|---|
| Ninguna                    | 0 |
| Menos de tres horas al día | 1 |
| 3-6 horas al día           | 2 |
| 6-8 horas al día           | 3 |
| Más de 8 horas al día      | 5 |
| Prefirió no contestar      | 7 |
| No sabe                    | 8 |

Puntuación por estar sentado(a) \_\_\_\_\_

Peso 1

**Puntuación índice por tiempo sentado(a):**

Puntuación por tiempo sentado(a) \_\_\_\_\_ X Peso \_\_\_\_\_ = \_\_\_\_\_

(Respuestas 7 u 8 son marcadas como ausentes)

8. ¿Aproximadamente, cuántos pisos sube andando por escaleras **cada** día? (1 piso = 10 escalones)

\_\_\_\_\_

9. Por favor, compare la cantidad de actividad física que hace durante otras temporadas del año con la cantidad de actividad que acaba de reportar como representativa del mes pasado. Por ejemplo, durante el verano, ¿usted hace más o menos actividad física de la que ha reportado en el último mes?

**Entrevistador:** favor circular la puntuación adecuada correspondiente a cada temporada.

|           | Mucha más | Poquito más | Igual | Poquito menos | Mucha menos | No sabe |
|-----------|-----------|-------------|-------|---------------|-------------|---------|
| Primavera | 1.30      | 1.15        | 1.00  | 0.85          | 0.70        | .       |
| Verano    | 1.30      | 1.15        | 1.00  | 0.85          | 0.70        | .       |
| Otoño     | 1.30      | 1.15        | 1.00  | 0.85          | 0.70        | .       |
| Invierno  | 1.30      | 1.15        | 1.00  | 0.85          | 0.70        | .       |

Puntuación con ajuste temporal: = suma de todas temporadas / 4 = \_\_\_\_\_

Entrevistador: favor documentar el tiempo: \_\_\_\_\_  
Hora      Minuto
